# Supplementary material for: PRKAR2A deficiency protects mice from experimental colitis by increasing IFN-stimulated gene expression and modulating the intestinal microbiota
Source: PubMed Central journal article supplement (PMC8528707; doi:10.1038/s41385-021-00426-2), 2021-08-04
Supplement: 41385_2021_426_MOESM1_ESM.pdf [file 41385_2021_426_MOESM1_ESM.pdf]

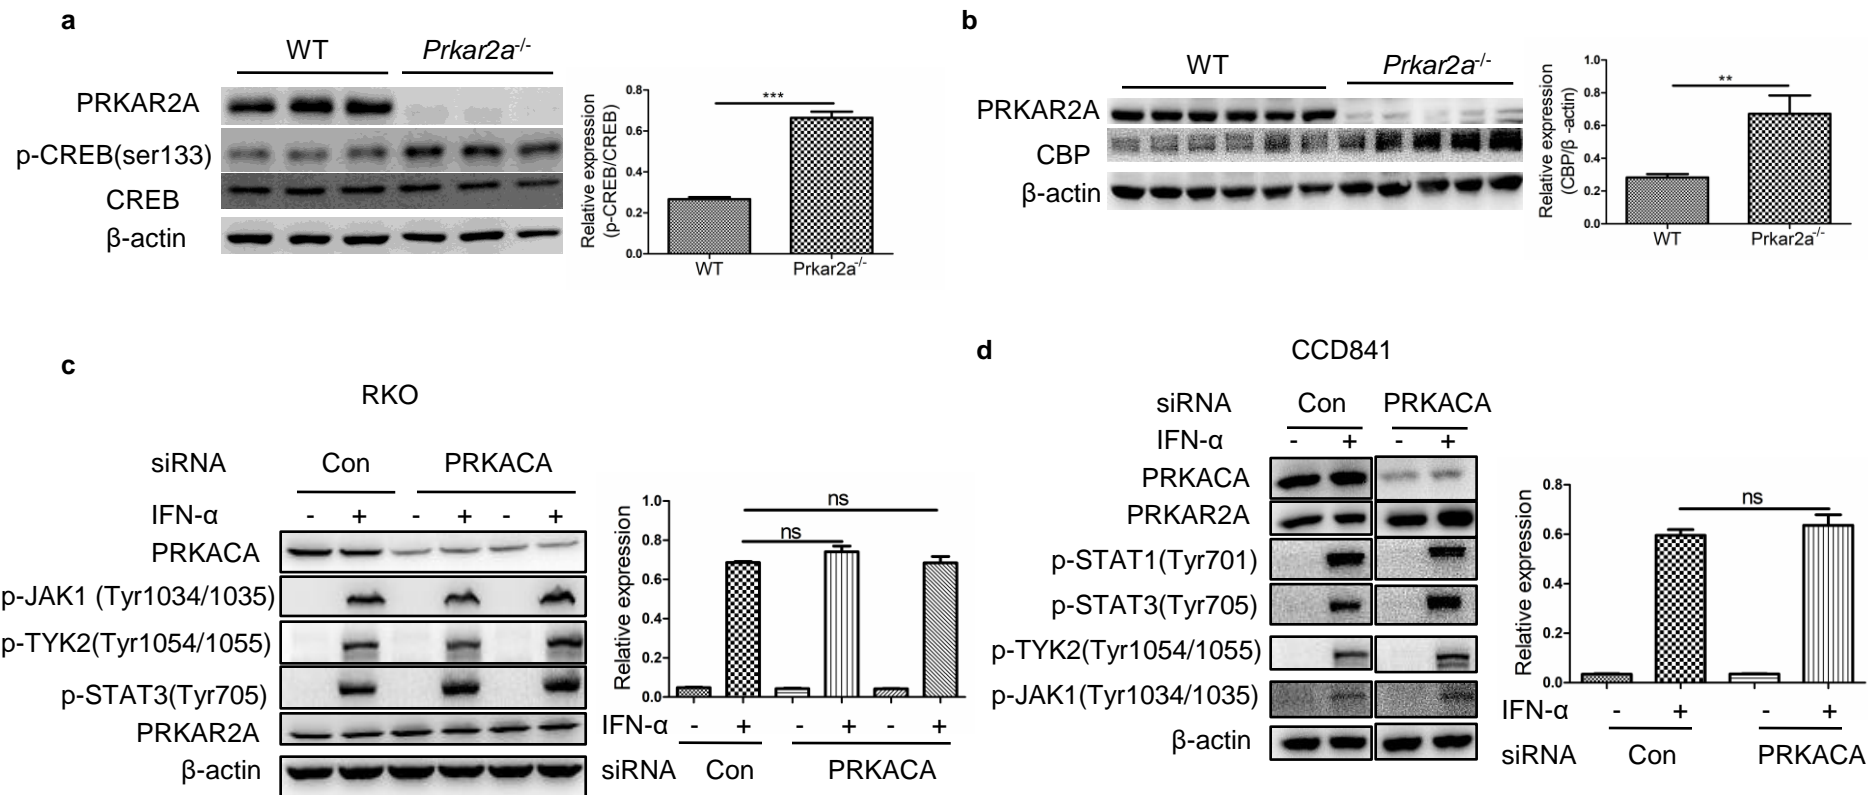

**Fig.s1 PKA catalytic subunit does not participate in regulating type I IFN-induced STAT3 activation.** Western blot analysis of p-CREB (ser133) (a) and CBP(b) in colon tissues collected from *Prkar2a*<sup>-/-</sup> and WT mice at day 6 of DSS-induced colitis. Expression of PRKACA was knocked down by siRNA in RKO (c) and CCD841 (d) cell line. The cells were stimulated with or without IFN- $\alpha$  (200ng/ml) for 30min, and the indicated proteins were detected by western blot. Data (a-d) are representative of two independent experiments. Data are presented as mean  $\pm$  SEM. Student's t-test (a,b,d) or one-way ANOVA (c) was used to do the analysis. \*\*p<0.01, \*\*\*p<0.001, ns not significant.

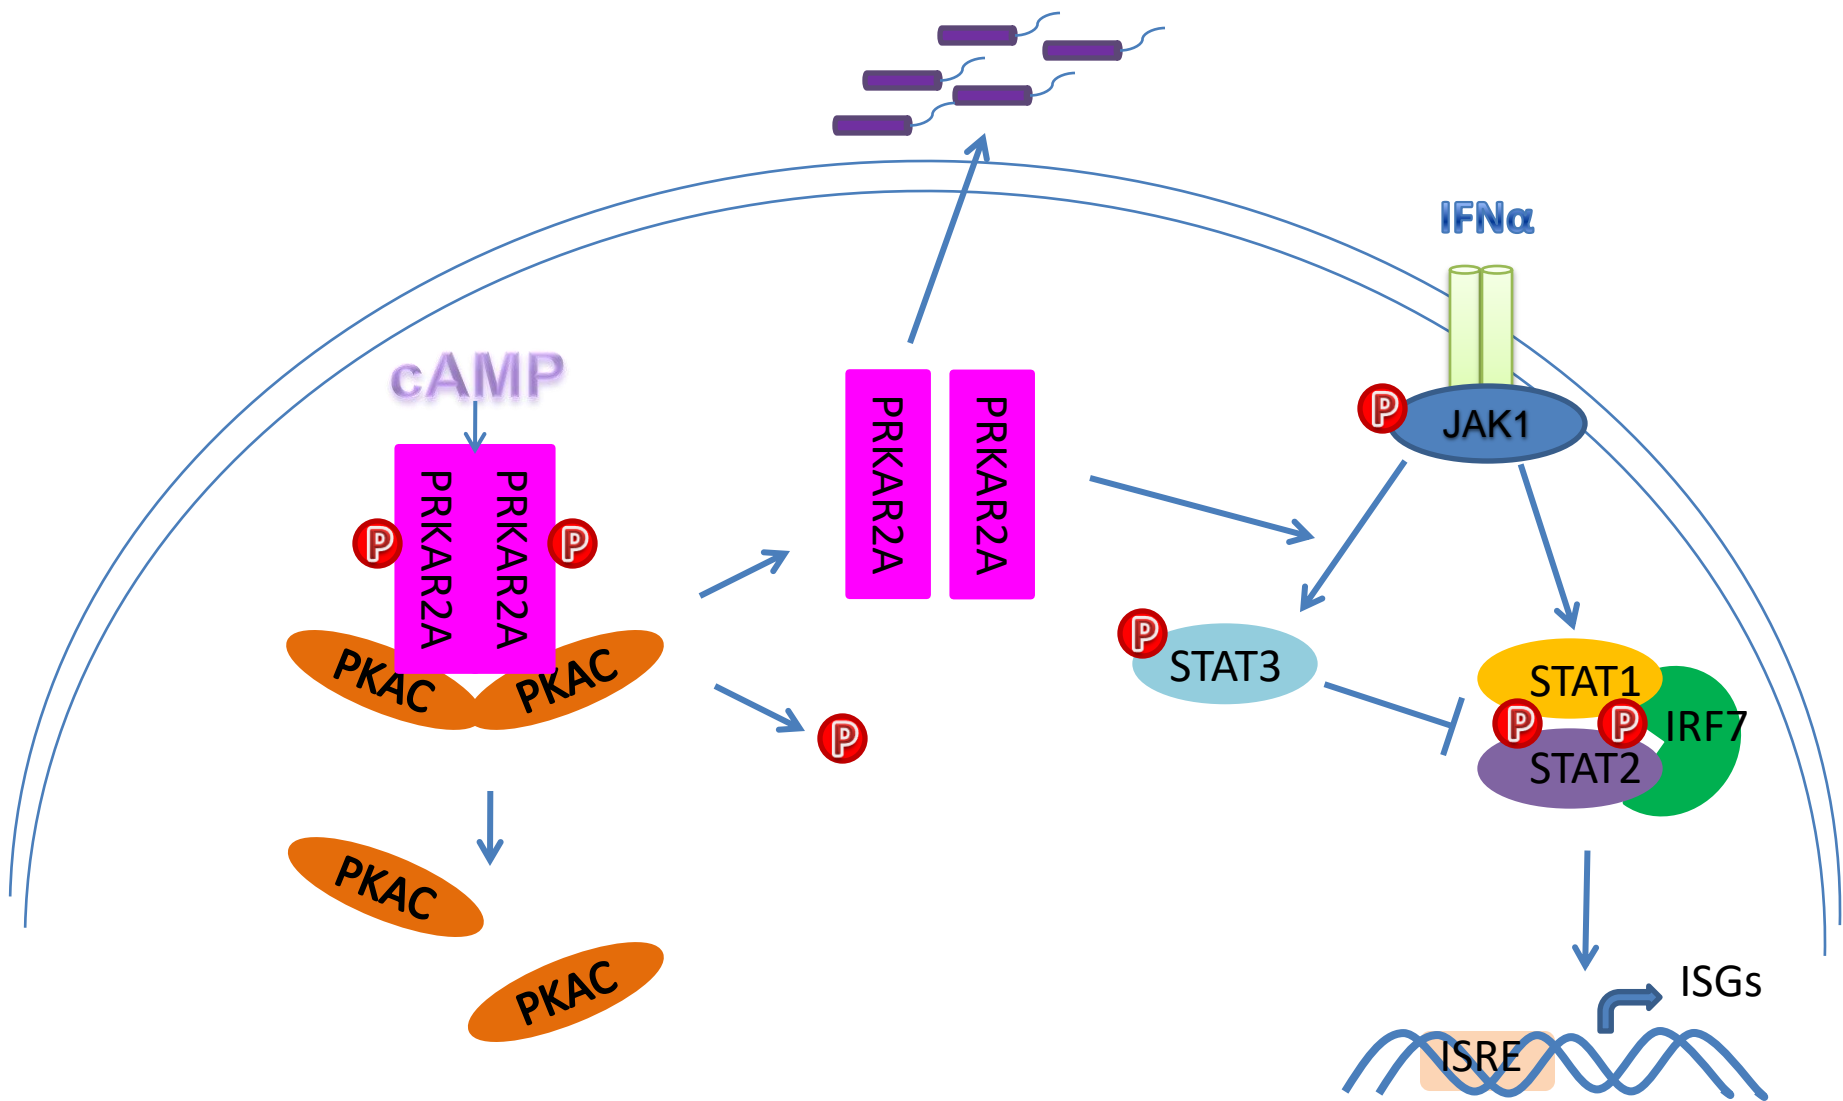

Fig.s2 Schematic diagram of the upstream and downstream signalling of PRKAR2A
